# Supplementary material for: Mitochondrial mutations in maternally inherited hearing loss
Source: BMC Med Genet. 2017 Mar 20;18:32. doi: 10.1186/s12881-017-0389-4 (PMC5359870; doi:10.1186/s12881-017-0389-4)
Supplement: Additional file 3: — Clinical features of probands carrying m.1555A > G or m.3243A > G. (XLSX 11 kb) [file 12881_2017_389_MOESM3_ESM.xlsx]

## Sheet: Sheet1
Additional file 3. Clinical features of probands carrying m.1555A>G or m.3243A>G.
Mutation	sex	Age of onset	Age at test time	Severity (R/L)	Audiometric configuration (R/L)	Progression	tinnitus	vertigo	DM	Speech discrimination (R/L)	DPOAE	fullfilling criteria?
m.1555A>G	M	3	3	severe/ severe	Steeply sloping/ Steeply sloping	Yes	Yes	No	No	Not tested	Not tested	Yes
m.1555A>G	F	21	27	moderate/ moderate	Steeply sloping/ Steeply sloping	Yes	Yes	No	No	55％/ 55%	R: NR except 1kHz, L: NR except 1kHz	Yes
m.1555A>G	M	13	13	severe/ severe	Steeply sloping/ Steeply sloping	Yes	Yes	No	No	20％/55%	Bilateral NR	Yes
m.1555A>G	F	0	46	severe/ severe	Gently sloping/ Steeply sloping	Yes	No	No	No	80%/80%	Not tested	No
m.3243A>G	F	27	35	moderate/ moderate	Gently sloping/ Gently sloping	Yes	unknown	unknown	No	95%/ 95%	Not tested	Yes
m.3243A>G	M	31	33	severe/ moderate	Gently sloping/ Gently sloping	Yes	Yes	No	Yes	Not tested	Not tested	No
m.3243A>G	M	43	45	severe/ moderate	Gently sloping/ Gently sloping	Yes	No	Yes	Yes	60%/ 75%	Not tested	No
m.3243A>G	F	39	42	moderate/ moderate	Flat/ Gently sloping	Yes	unknown	No	Yes	60%/70%	Not tested	No
R, right ear; L, left ear; DM, diabetes mellitus; NR, No response; DPOAE, distortion-product otoacoustic emissions.
